# Supplementary material for: Efficacy and Safety of the Human Glucagon-Like Peptide-1 Analog Liraglutide in Combination With Metformin and Thiazolidinedione in Patients With Type 2 Diabetes (LEAD-4 Met+TZD)
Source: Oxford University Press journal article supplement (doi:10.2337/dc08-2124), 2009-03-16
Supplement: dc082124-sup-zinman_lead_4_online_appendix_1_1-23-09.doc [file dc082124-sup-zinman_lead_4_online_appendix_1_1-23-09.doc]

**Online Appendix 1**

**LEAD-4 Study investigators**

Bailey, G, Red Deer Medical Centre, Red Deer, Canada; Belanger, A, Centre de Recherche, Laval, Canada; Bowering, K, Baker Clinic, Edmonton, Canada; Garon, J, CEDL, Gatineau, Canada; Gottesman, I , C.V.E.R., Mississauga, Canada; Hierlihy, P, Ottawa Hospital and Ottawa University Ottawa, Canada; Hramiak, I , St. Joseph's HC/London, London, Canada; Kovacs, C, Health Sciences Centre, St John's, Canada; Leiter, L, SMH Health Centre, Toronto, Canada; Ross, S, Private Clinic, Calgary, Canada; Shaban, J, Private Clinic, Windsor, Canada; Thompson, D, Vancouver Hospital, Vancouver, Canada; Ur, E, QE II HSC CDHA, Halifax, Canada; Woo, V, HSC, Winnipeg, Canada; Yale, J-F, MUHC-Royal Victoria Hospital, Montreal, Canada; Zinman, B, Mt. Sinai Hospital, Toronto, Canada; Weisnagel, S, C.H.U.L, Sainte-Foy, Canada; Ekoe, J-M, IRCM, Montreal, Canada; Abbott, L, Lisa Abbott, Reno, USA; Abelseth, J, TEG, Albany, USA; Anderson, C, Dedicated Clinical Research, Litchfield, USA; Bailey, T, North County Endocrine Medica, Escondido, USA; Bakdash, M, TTUHC, Lubbock, USA; Barrera, J, Mission Internal Medicine Group, Mission Viejo, USA; Blonde, L, Ochsner Clinic Foundation, New Orleans, USA; Bode, B, Atlanta DAED, Atlanta, USA; Bressler, P, North Texas Endocrine Center, Dallas, USA; Buse, J, UNCCH, Chapel Hill, USA; Cefalu, W, Pennington Biomedical Research, Baton Rouge, USA; Chandiok, S, Arrowhead Regional Medical Cen, Colton, USA; Chisolm, O, Kelsey-Seybold Clinic, Houston, USA; Clarke, D, Diabetes Health Center, Salt Lake City, USA; Corbett, B, Middle Tyger Family Medicine, Duncan, USA; Feinglos, M, Duke University Medical Center, Durham, USA; Garber, A, Baylor College of Medicine - P, Houston, USA; Gerich, J, University Of Rochester Medica, Rochester, USA; Gollapudi, G, Diabetes Center Of The Southwest, Midland, USA; Hartman, I, Multiple Health Options, Arlington, USA; Hassman, D, Comprehensive Clinical Research, Berlin, USA; Hippler, S, OSFMG - Clinical Research Cent, Peoria, USA; Hollander, P, BUMC, Dallas, USA; Horn, C, Quality Research Incorporated, San Antonio, USA; Hseuh, W, UCLA DEDH, Los Angeles, USA; Jain, R, Advanced Healthcare Science Ce, Milwaukee, USA; Kaplan, R, East Bay, Concord, USA; Kapoor, A, Northport, USA; Koehler, L, Wells Institute For Health Awa, Kettering, USA; Leslie, H, Best Clinical Research, Atlanta, USA; Levin, E, Southern CA Institute For Research, Long Beach, USA; Lewin, A, National Research Institute, Los Angeles, USA; Licata, A, Cleveland Clinic Heath System, Lakewood, USA; Lipetz, R, Encompass Clinical Research, Spring Valley, USA; Lubin, B, Hampton Roads Center For Clinical Research, Norfolk, USA; Marcelli, M, BCOM, Houston, USA; McGill, J, WU, St. Louis, USA; Mokshagundam, S, Joslin Diabetes Center, New Albany, USA; Mudaliar, S, VA San Diego Healthcare System, San Diego, USA; Myers, L, Kentucky Diabetes-Endocrinology, Lexington, USA; Hoekstra, J, National Clinical Research Inc, Richmond, USA; Ollins, R, ARS Clinical Trials, Powder Springs, USA; Osei, K, The Ohio State University Medical School, Columbus, USA; Perlman, M, Perlman Clinic, La Jolla, USA; Peterson, G, Diabetes & Critical Care Medic, Des Moines, USA; Petit, W, Hosp of Central CT, New Britain, USA; Phaneuf, J, Rowan Research Inc., Spokane, USA; Phillips, L, Emory, Atlanta, USA; Pietri, A, LCFP Inc., Fort Myers, USA; Pollock, J, Endocrine Clinic, Plantation, USA; Pragalos, A, Community Research, Cincinnati, USA; Ramlo-Halsted, B, University Of Cincinnati, Cincinnati, USA; Raskin, P, TUTSMC, Dallas, USA; Reeves, M, Dr Michael Reeves, Chattanooga, USA; Roberts, V, Endocrine Clinical Research, Winter Park, USA; Rosenstock, J, Dallas Diabetes / Endocrine Ce, Dallas, USA; Schear, M, Dayton Clinical Research, Dayton, USA; Schumacher, D, Radiant Research Inc, Columbus, USA; Schwartz, S, Diabetes & Glandular Disease , San Antonio, USA; Segel, S, NE FL Endocrine & Diabetes Center, Jacksonville, USA; Shepard, M, Endocrinology Consultants P, Tupelo, USA; Shomali, M, Medlantic Clinical Research Center, Washington, USA; Tonkon, M, Apex Research Institute, Santa Ana, USA; Cheatham, W, Medstar Research Institute, Washington, USA; Vance, C, Rocky Mountain Diabetes & Osteoporosis Center, Idaho Falls, USA; Warren, M, Physicians East PA, Greenville, USA; Weinrib, S, Mountain Diabetes & Endocrinology, Asheville, USA; Weiss, D, Your Diabetes Endocrine Nutrition, Mentor, USA; Williams, R, GCPG, Athens, USA; Winer, N, State University Of New York, Brooklyn, USA; Wynne, A, Cotton O'Neil Diabetes & Endocrinology, Topeka, USA; Zisser, H, SDRI, Santa Barbara, USA; Duckor, S, Advanced Clinical Research Ins, Orange, USA; Ragain, RM, TTUHC, Lubbock, USA; Collins G, Charlotte Clinical Research, Inc. Charlotte, USA; Busick, E, Clinical Research, Waltham, USA; Harper, W, Wake Research Associates, Raleigh, USA
